# Supplementary material for: Poly (3,4-Ethylenedioxythiophene) (PEDOT) Nanofibers Decorated Graphene Oxide (GO) as High-Capacity, Long Cycle Anodes for Sodium Ion Batteries
Source: MDPI journal article supplement (doi:10.3390/ma11102032), 2018-10-19
Supplement: s1 [file s1]

# Poly (3,4-Ethylenedioxythiophene) (PEDOT) Nanofibers Decorated Graphene Oxide (GO) as High-Capacity, Long Cycle Anodes for Sodium Ion Batteries

Zejun Pu<sup>1</sup>, Penglun Zheng<sup>2,\*</sup> and Yu Zhang<sup>3,\*</sup>

<sup>1</sup> College of Materials Science and Engineering, Sichuan University of Science & Engineering, Zigong 643000, China; puzj@susue.edu.cn

<sup>2</sup> High Temperature Resistant Polymer and Composites Key Laboratory of Sichuan Province, University of Electronic Science and Technology of China, Chengdu 610054, China

<sup>3</sup> School of Materials Science and Engineering, Nanyang Technological University, 50 Nanyang Avenue, Singapore 639798, Singapore

\* Correspondence: 18482179228@163.com (P.A.); yzhang071@e.ntu.edu.sg (Y.Z.)

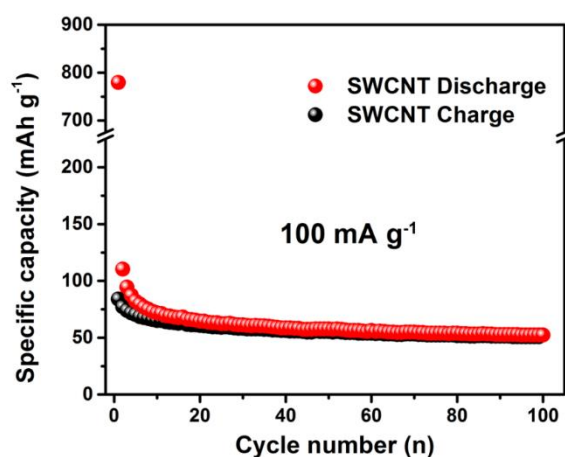

**Figure S1.** Cycling performance of the pure SWCNT electrode for SIBs at a current density of 100 mA g<sup>-1</sup>.
